# American Psychiatric Association Publishing Textbook of Psychopharmacology, Fifth Edition

Edited by Alan F. Schatzberg, M.D., and Charles B. Nemeroff, M.D., Ph.D.

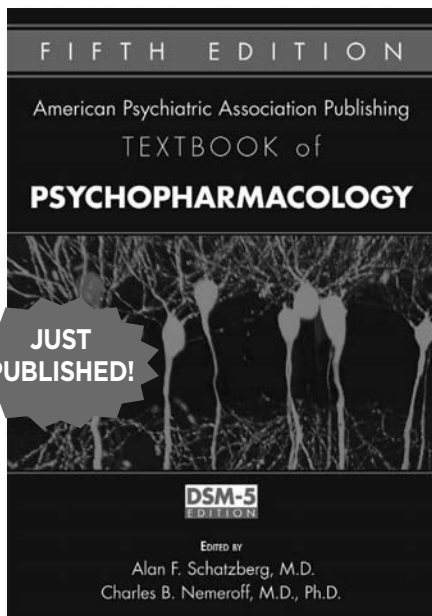

The *American Psychiatric Association Publishing Textbook of Psychopharmacology* is an indispensable and comprehensive resource for clinicians and trainees who prescribe psychotropic medications. Updated to reflect the new DSM-5 classification, this revised Fifth Edition maintains the user-friendly structure of its predecessors while offering in-depth coverage of the latest research in pharmacological principles, classes of drugs, and psychiatric disorders. Introductory chapters provide a theoretical grounding in clinical applications, with topics ranging from neurotransmitters to brain imaging in psychopharmacology. The bulk of the book is devoted to various classes of drugs, including antidepressants, anxiolytics, antipsychotics, mood stabilizers, and other agents, with each class divided into chapters on specific drugs—either new or revised to include the latest findings and trends.

Finally, the section on psychopharmacological treatment addresses evidence-based principles of clinical care for the full spectrum of mental disorders and conditions as well as for specific populations and circumstances—offering information on topics such as medication selection, combination and maintenance dosing regimens, monitoring and management of side effects, and strategies for optimizing treatment response.

## The book's beneficial features are many:

- The section on principles of pharmacology has been revised and reorganized to incorporate recent discoveries from the fields of neurobiology, genetics, brain imaging, and epidemiology.
- History and discovery, structure-activity relationships, pharmacological profiles, pharmacokinetics and disposition, mechanisms of action, indications and efficacy, side effects and toxicology, and drug-drug interactions are addressed for each agent. This consistent structure places the desired information at the clinician's fingertips and facilitates study for trainees.
- Coverage of drugs approved since the last edition is thorough, encompassing new antidepressants (e.g., vortioxetine), new antipsychotics (e.g., cariprazine), and agents on the clinical horizon (e.g., ketamine).

A work of uncommon scientific rigor and clinical utility, *The American Psychiatric Association Publishing Textbook of Psychopharmacology* provides state-of-the-art information on both the principles and the practice of psychopharmacological treatment of psychiatric disorders.

2017 • 1,823 pages • ISBN 978-1-58562-523-9 • Hardcover • \$299.00 • Item #62523

2017 • 1,823 pages • ISBN 978-1-61537-122-8 • eBook • \$240.00 • Item #37122

AMERICAN  
PSYCHIATRIC  
ASSOCIATION  
PUBLISHING

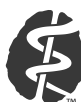

[www.appi.org](http://www.appi.org)

Email: [appi@psych.org](mailto:appi@psych.org)

Toll Free: 1-800-368-5777

20% Discount for American Psychiatric Association Members  
25% Discount for APA Resident-Fellow Members

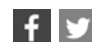

Priority Code AH1713

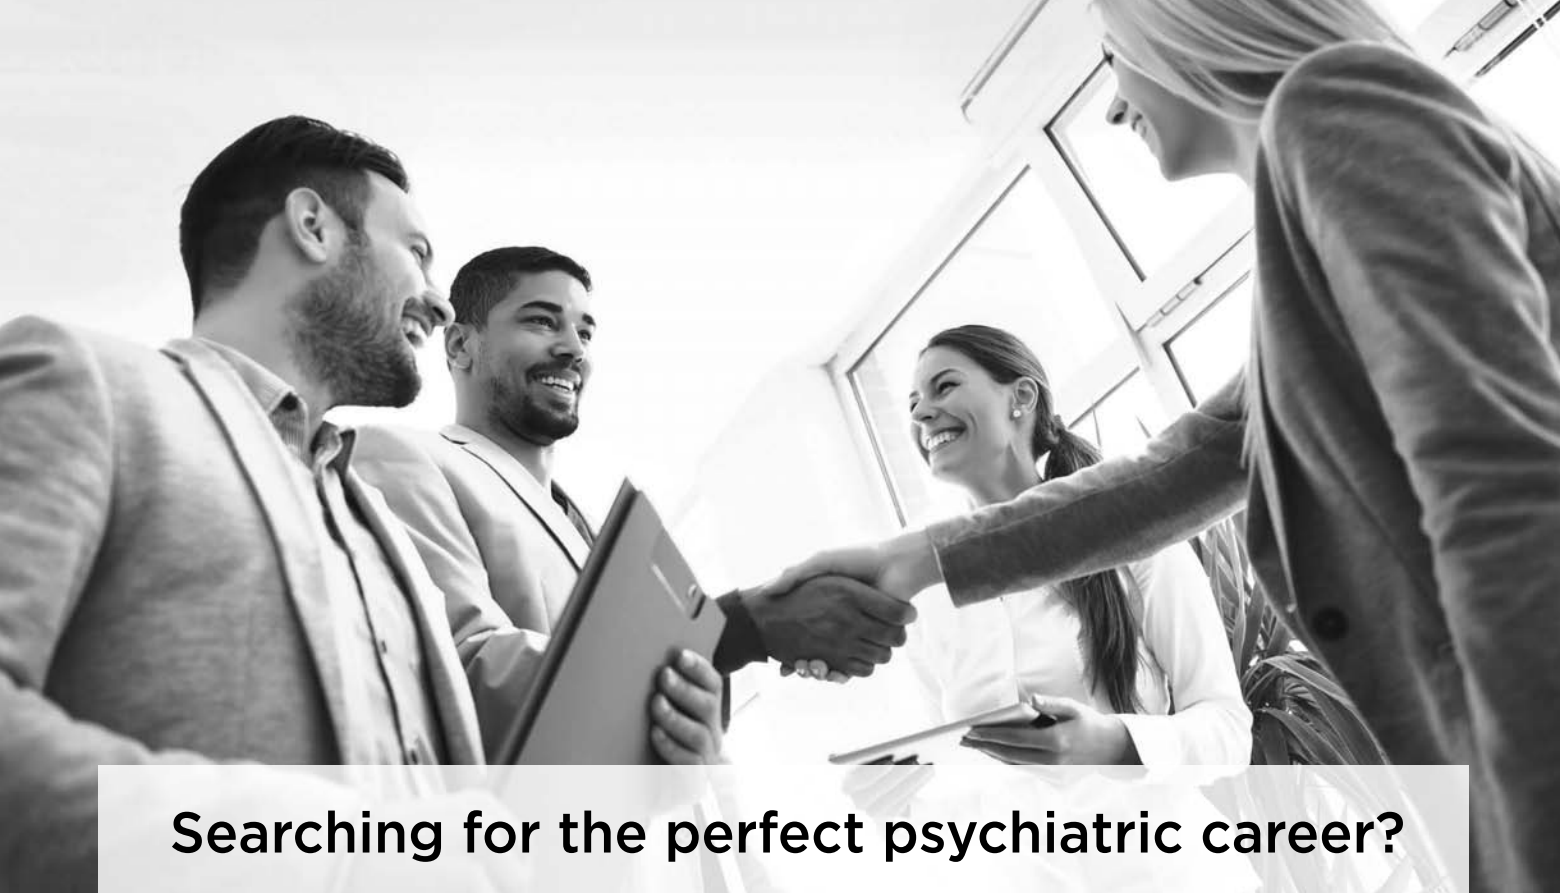

Searching for the perfect psychiatric career?

**Let APA JobCentral help!**

### Manage Your Career

- Browse hundreds of active job listings!
- Create an account to save jobs, store multiple resumes and cover letters and communicate with employers through our internal messaging system.
- Set up multiple job alerts specifying your skills, interests and location to receive e-mails when employers post jobs that match your criteria.

### Recruit for Open Positions

- Post your job in front of thousands of highly qualified psychiatrists.
- Cross promote your job listing in *Psychiatric News*.
- Search the anonymous resume database to find your ideal candidate.

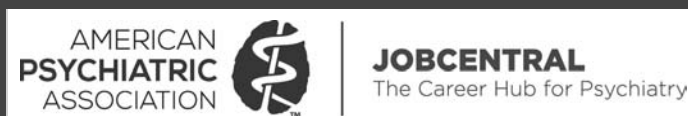

[jobs.psychiatry.org](http://jobs.psychiatry.org)

**Psychiatric Services** (ISSN 1075-2730; online version, 1557-9700) is published monthly by the American Psychiatric Association, editorial and executive office, 1000 Wilson Blvd., Suite 1825, Arlington, VA 22209-3901. Copyright © 2017 by the American Psychiatric Association. Printed in U.S.A. Periodicals postage paid at Arlington, VA, and at additional mailing offices. POSTMASTER: Send address changes to **Psychiatric Services, 1000 Wilson Blvd., Suite 1825, Arlington, VA 22209-3901.**



"Correctional Health Services provides an excellent foundation to build your career. You have a lot of freedom to set your own parameters. We have a large supportive team and we bounce ideas off each other."  
**Joseph Simpson, M.D.**  
 Supervising Psychiatrist,  
 Correction Health Services

## UNLIMITED GROWTH OPPORTUNITIES

Los Angeles County has immediate openings with Antelope Valley, Correctional Health Services, Juvenile Halls and Probation Camps, and directly operated programs. This is your chance to join one of the nation's leading mental health agencies and work in a safe, diverse, and challenging environment. The County is filled with opportunities for professional development and growth, including new full-time and part-time psychiatrist positions.



[www.psychiatristjobs.la](http://www.psychiatristjobs.la)

- ✓ Competitive starting salaries and benefits
- ✓ Potential Bonuses up to \$30,000\* a year
- ✓ Up to 24 hours /wk for outside employment

\*Depending on qualifications and placement.

"What attracted me to this opportunity was the flexibility to practice in so many settings. If you want a change in treatment settings or a change of patient population, you can do that all within the same employer, and that employer is DMH."  
**Marcia Mshewa, M.D.**  
 Psychiatrist, Correctional Health Services

Visit [ps.psychiatryonline.org](http://ps.psychiatryonline.org) for these features!

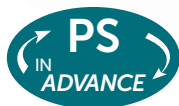

*New content is available in advance of print every 2 weeks!*

**Person-Oriented Recovery of Individuals With Serious Mental Illnesses: A Review and Meta-Analysis of Longitudinal Findings**

**Differential Reimbursement of Psychiatric Services by Psychiatrists and Other Medical Providers**

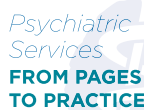

*Audio highlights of PS in Advance content*

Listen to our podcast, **Psychiatric Services From Pages to Practice** and learn about the latest mental health services research and why it is relevant.

**Episode 6:** Child abuse rates with treated mental illness, crisis intervention training outcomes in Colorado, smoking cessation and mental illness

**Sign up (<http://appi.org/etocs>) to receive alerts as soon as new content is available.**

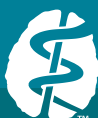

# The American Psychiatric Association Publishing Textbook of Forensic Psychiatry, Third Edition

Edited by Liza H. Gold, M.D., and Richard L. Frierson, M.D.

JUST PUBLISHED!

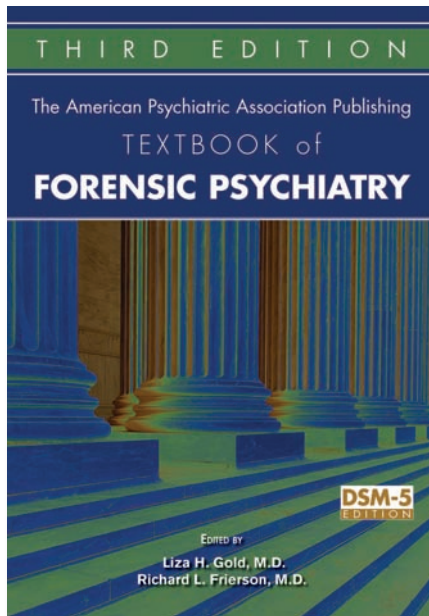

The new, third edition of *The American Psychiatric Association Publishing Textbook of Forensic Psychiatry*, now under the insightful leadership of Drs. Gold and Frierson, has undergone a major expansion and a comprehensive revision that reestablish it as the preeminent text in the field. No fewer than 10 new chapters have been added, and the entire book has been restructured to reflect the American Board of Psychiatry and Neurology's Content Outline for the Certification Examination in Forensic Psychiatry, thus facilitating its use in preparing for certification or maintaining certification.

In addition, the book constitutes a useful reference for general psychiatrists and psychologists interested in the legal issues that may impact clinical practice. The emphasis on Landmark Cases—as

fascinating as they are illuminating of critically important topics in case law—is highlighted in this edition, fostering understanding of the evolution of legal principles on the general practice of psychiatry and in the subspecialty of forensic psychiatry.

Written by some of the foremost experts in the field and structured for optimal utility, *The American Psychiatric Association Publishing Textbook of Forensic Psychiatry* will play an indispensable role both in educating forensic psychiatry fellows and general psychiatry residents and in keeping experienced clinicians up-to-date.

2018 • 568 pages • ISBN 978-1-61537-067-2 • Hardcover • \$145.00 • Item #37067

2018 • 568 pages • ISBN 978-1-61537-146-4 • eBook • \$116.00 • Item #37146

AMERICAN  
PSYCHIATRIC  
ASSOCIATION  
PUBLISHING

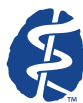

[www.appi.org](http://www.appi.org)

Email: [appi@psych.org](mailto:appi@psych.org)

Toll Free: 1-800-368-5777

20% Discount for American Psychiatric Association Members  
25% Discount for APA Resident-Fellow Members

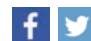

Priority Code AH1743
