# Psychiatric Services

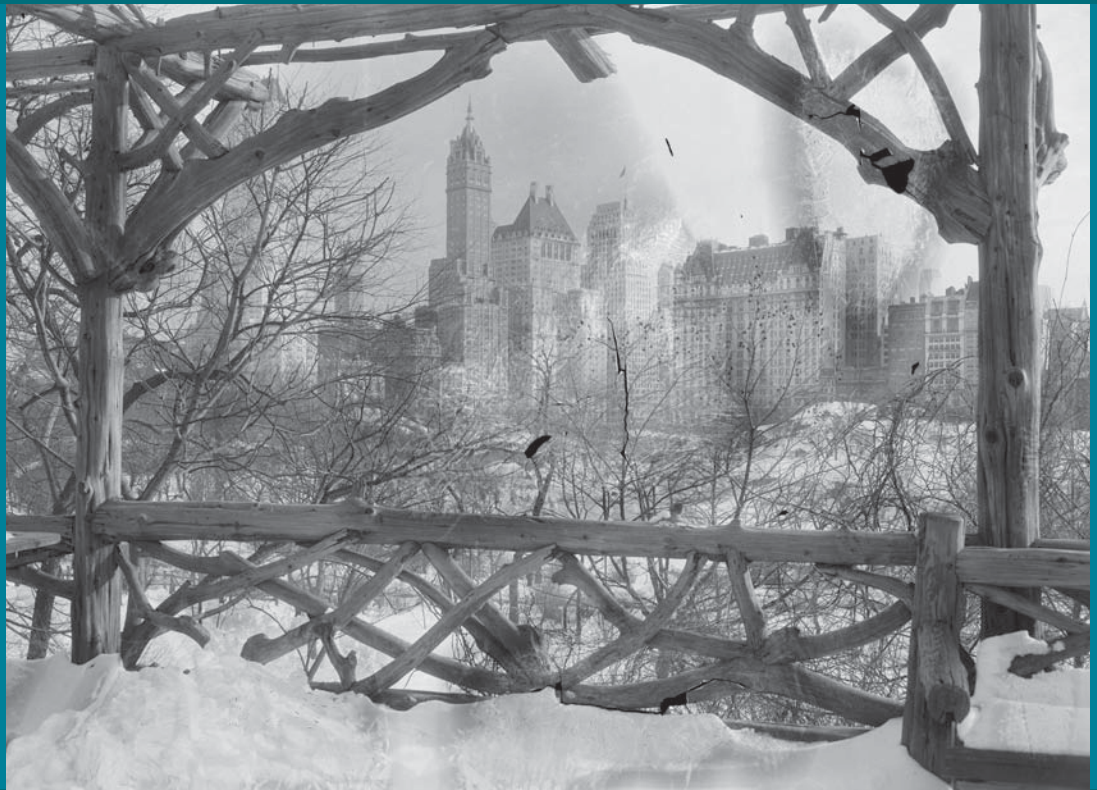

When will telepsychiatry reach its tipping point?

A consumer survey on discontinuing psychiatric medications

Reducing hospital readmission with assertive hospital discharge planning

Leveraging roles of community mental health workers and peer support specialists
